# Supplementary material for: Facile synthesis of nanoparticle-stacked tungsten-doped nickel iron layered double hydroxide nanosheets for boosting oxygen evolution reaction
Source: Royal Society of Chemistry journal article supplement (doi:10.1039/d0ta00691b), 2020-01-01
Supplement: d0ta00691b1.pdf [file d0ta00691b1.pdf]

## Supporting Information

### **Facile Synthesis of Nanoparticle-stacked Tungsten-doped Nickel Iron Layered Double Hydroxide Nanosheets for Boosting Oxygen Evolution Reaction**

Libo Wu,<sup>a,b</sup> Luo Yu,<sup>a</sup> Fanghao Zhang,<sup>a,c</sup> Dezhi Wang,<sup>a</sup> Dan Luo,<sup>a</sup> Shaowei Song<sup>a,b</sup> Chuqing Yuan,<sup>b</sup> Alamgir Karim,<sup>b,d</sup> Shuo Chen<sup>a</sup>, and Zhifeng Ren<sup>a,\*</sup>

<sup>a</sup> *Department of Physics and Texas Center for Superconductivity at the University of Houston (TcSUH), University of Houston, Houston, Texas 77204, USA*

<sup>b</sup> *Materials Science and Engineering Program, University of Houston, Houston, Texas 77204, USA*

<sup>c</sup> *Department of Chemistry, University of Houston, Houston, Texas 77204, USA*

<sup>d</sup> *Department of Chemical and Biomolecular Engineering, University of Houston, Houston, Texas 77204, USA*

\*Corresponding author: Zhifeng Ren, E-mail address: [zren@uh.edu](mailto:zren@uh.edu)

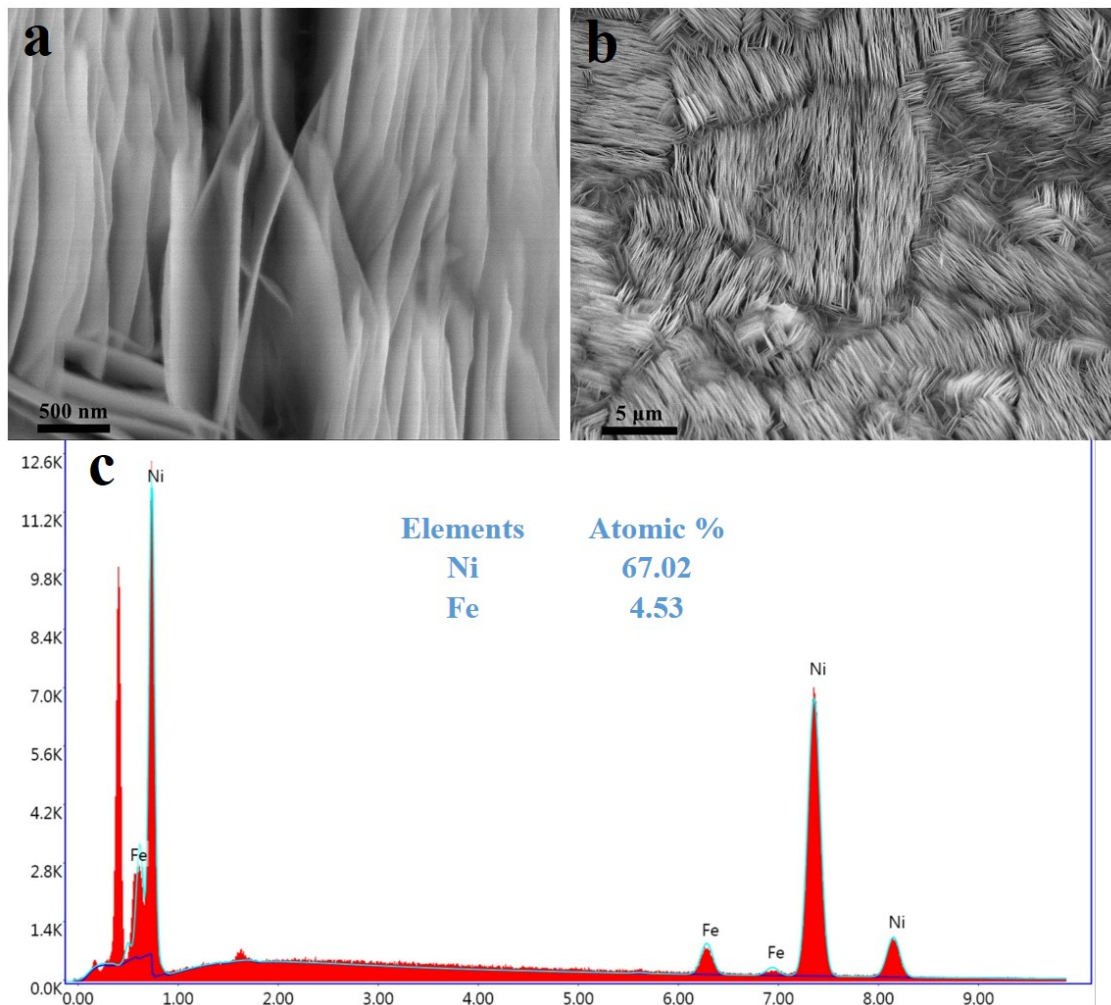

**Figure S1.** (a, b) SEM images and (c) the corresponding EDS spectrum of Ni<sub>3</sub>Fe LDH/NF.

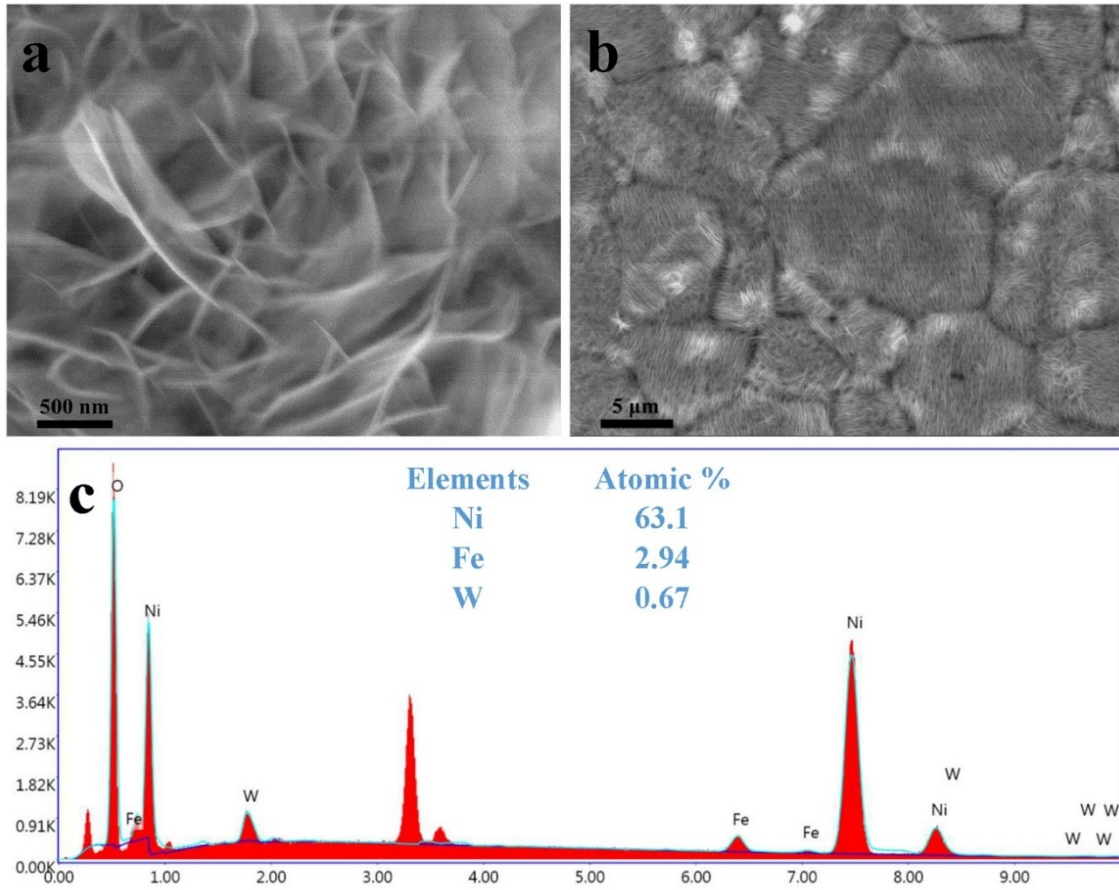

**Figure S2.** (a, b) SEM images and (c) the corresponding EDS spectrum of  $\text{Ni}_3\text{FeW}_{0.5}$  LDH/NF.

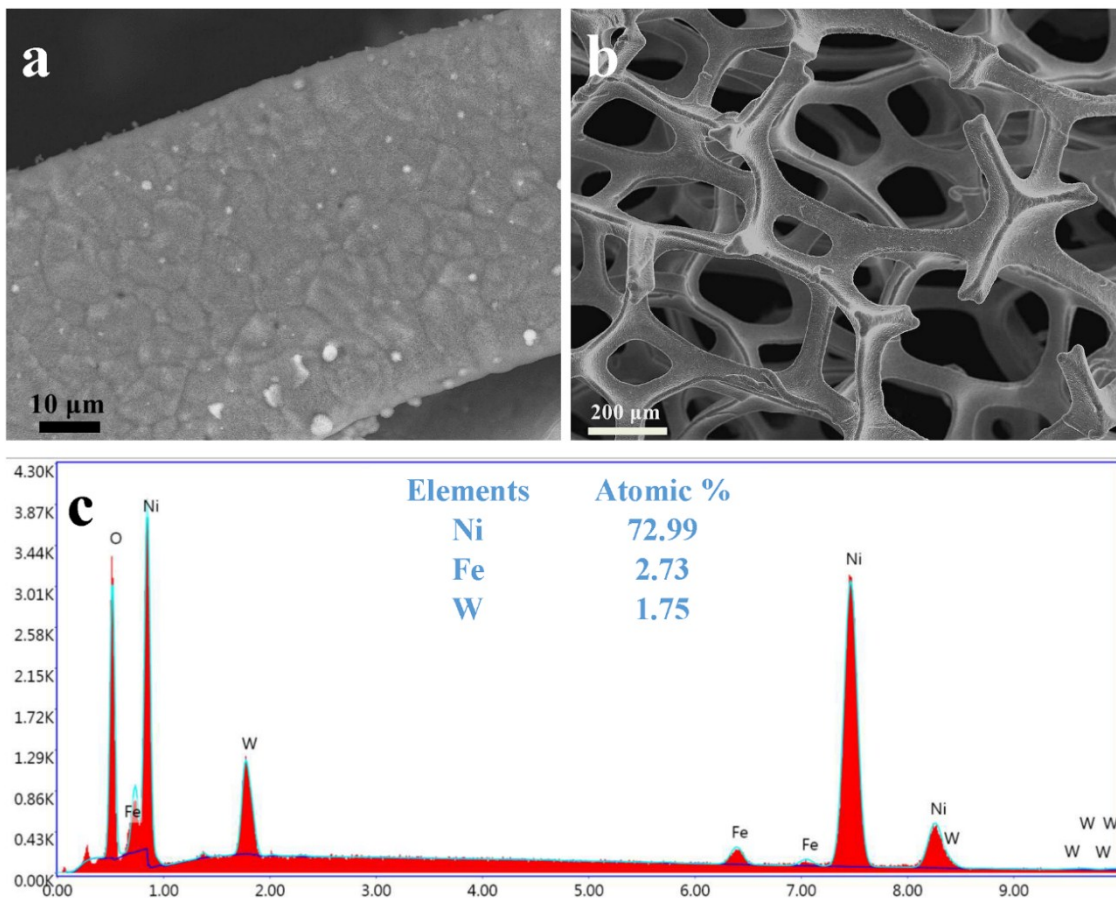

**Figure S3.** (a, b) SEM images and (c) the corresponding EDS spectrum of the Ni<sub>3</sub>FeW LDH/NF.

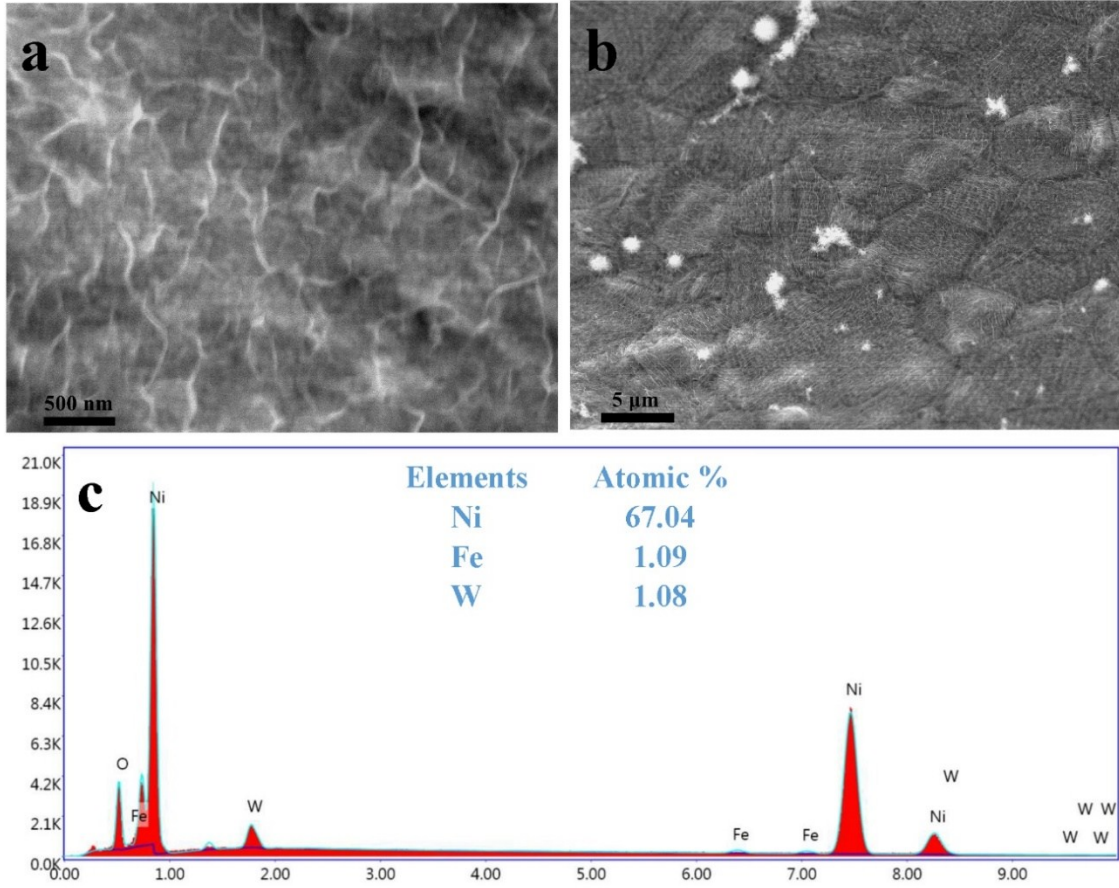

**Figure S4.** (a, b) SEM images and (c) the corresponding EDS spectrum of  $\text{Ni}_3\text{FeW}_2$  LDH/NF.

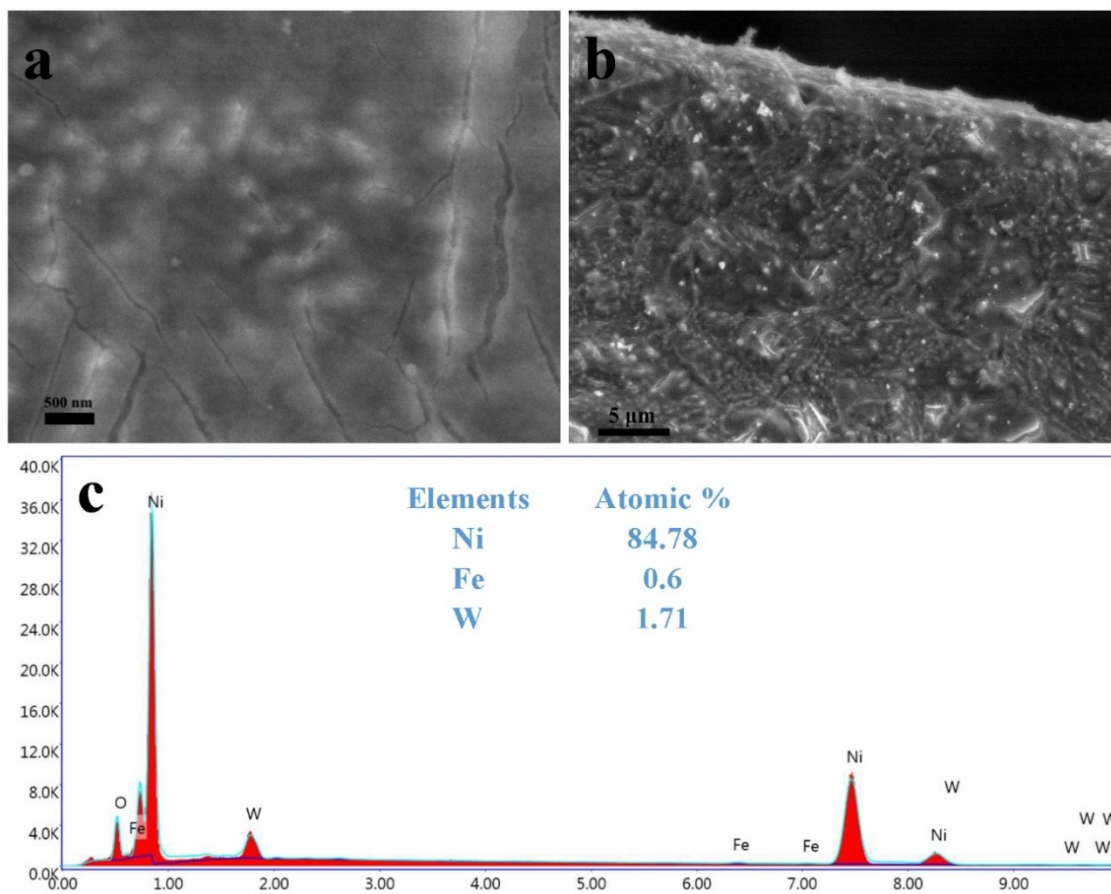

**Figure S5.** (a, b) SEM images and (c) the corresponding EDS spectrum of  $\text{Ni}_3\text{FeW}_3$  LDH/NF.



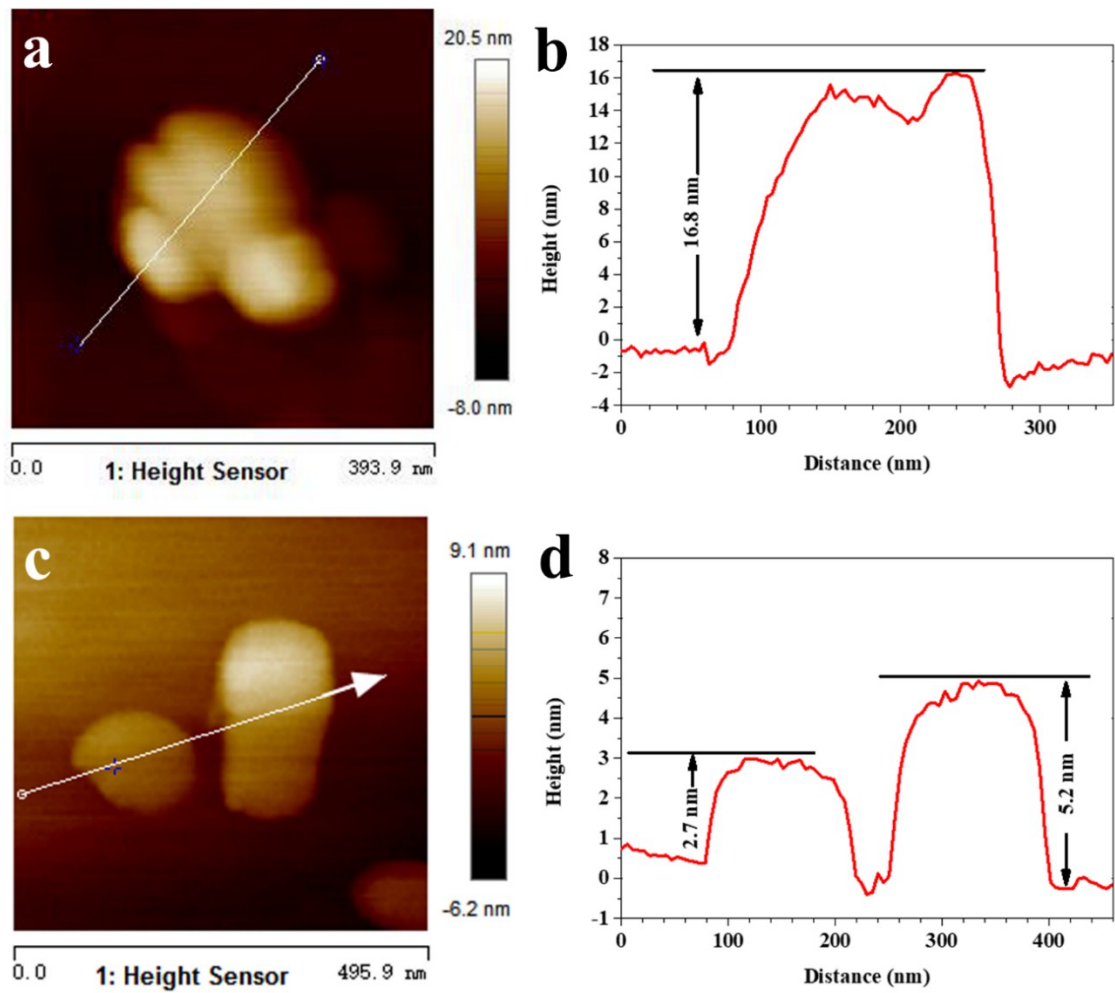

**Figure S6.** AFM images and corresponding height profiles of (a, b)  $\text{Ni}_3\text{Fe}$  LDH and (c, d)  $\text{Ni}_3\text{FeW}$  LDH nanosheets.

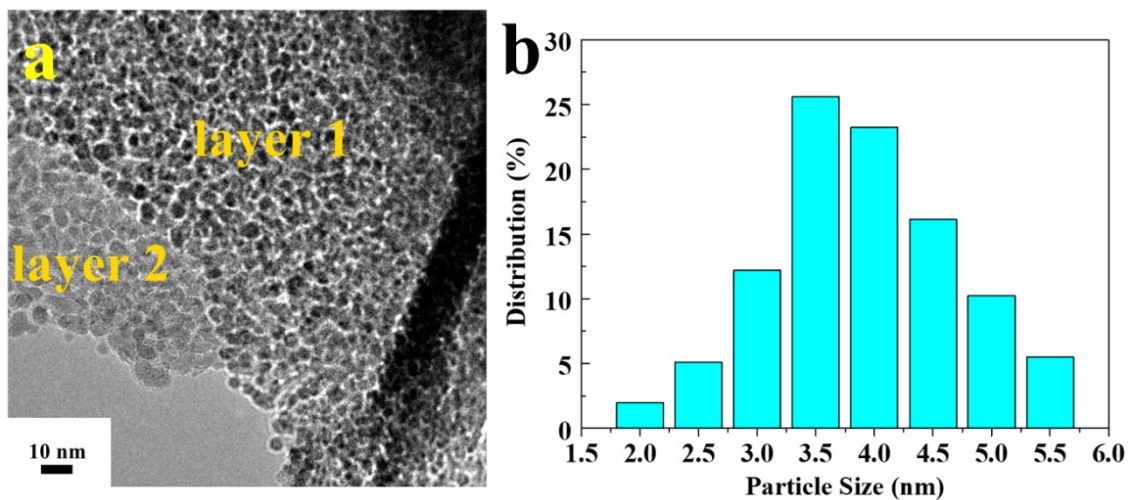

**Figure S7.** (a) TEM image of two layers of Ni<sub>3</sub>FeW LDH nanosheets and (b) the corresponding nanoparticle diameter distribution calculated from (a).



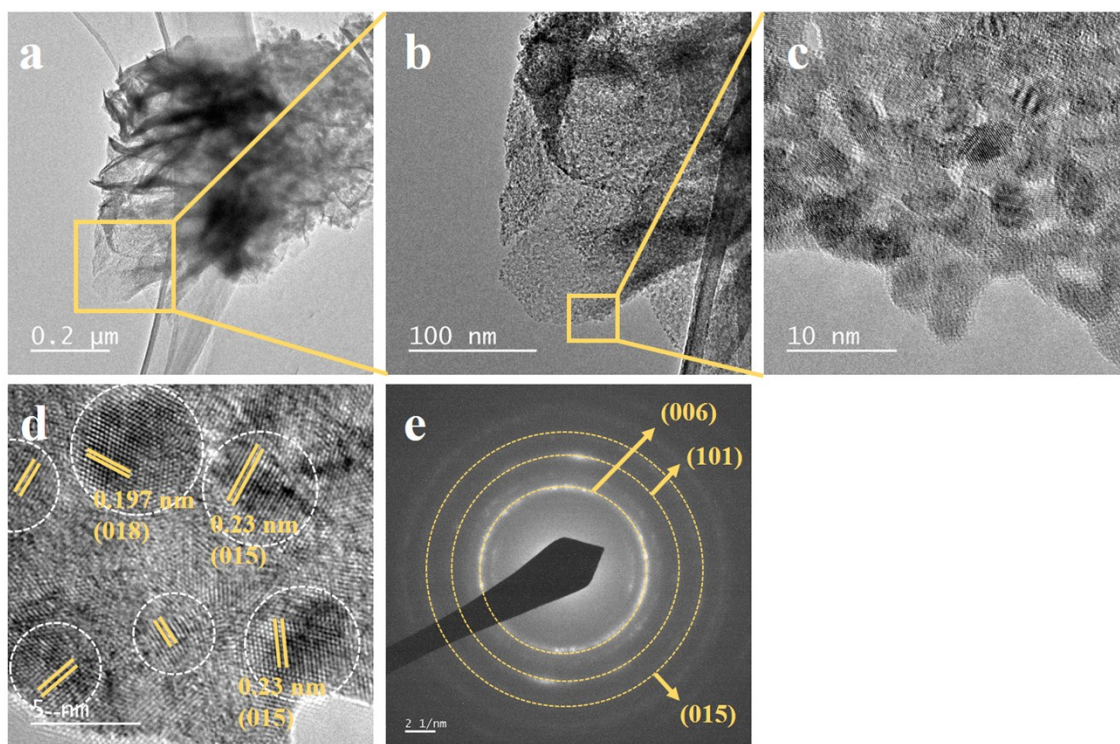

**Figure S8.** (a, b) TEM and (c, d) HRTEM images and (e) SAED pattern of Ni<sub>3</sub>FeW LDH nanosheets.

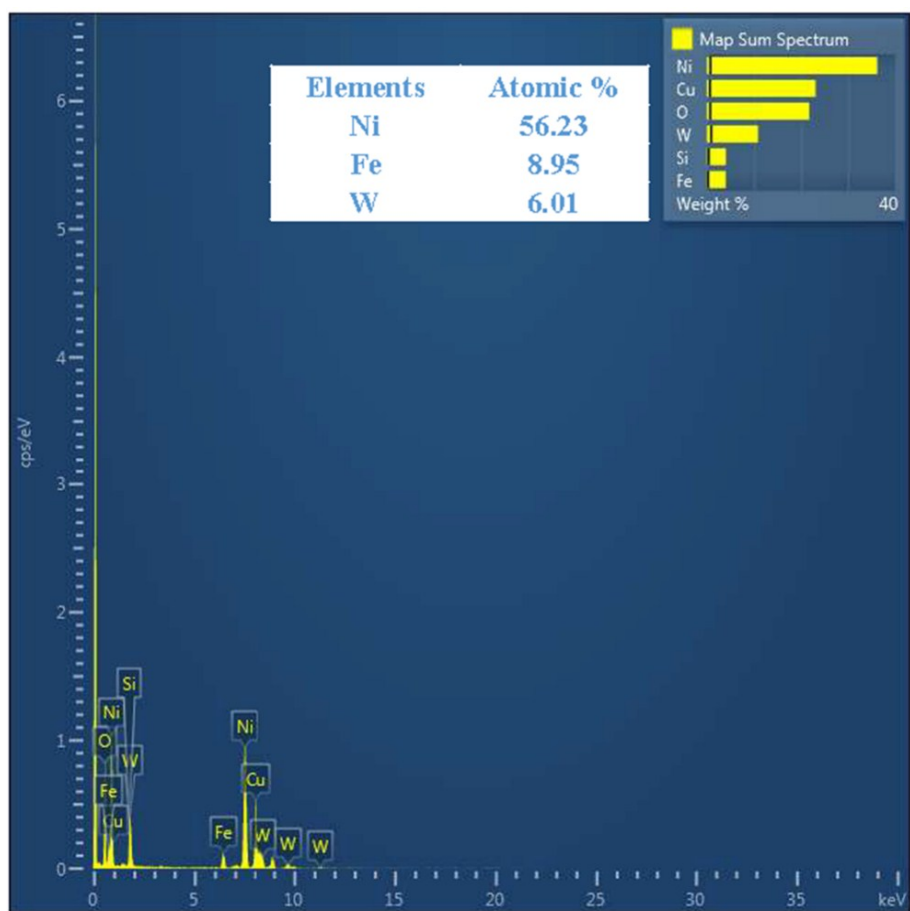

**Figure S9.** TEM EDX spectrum of Ni<sub>3</sub>FeW LDH nanosheets.

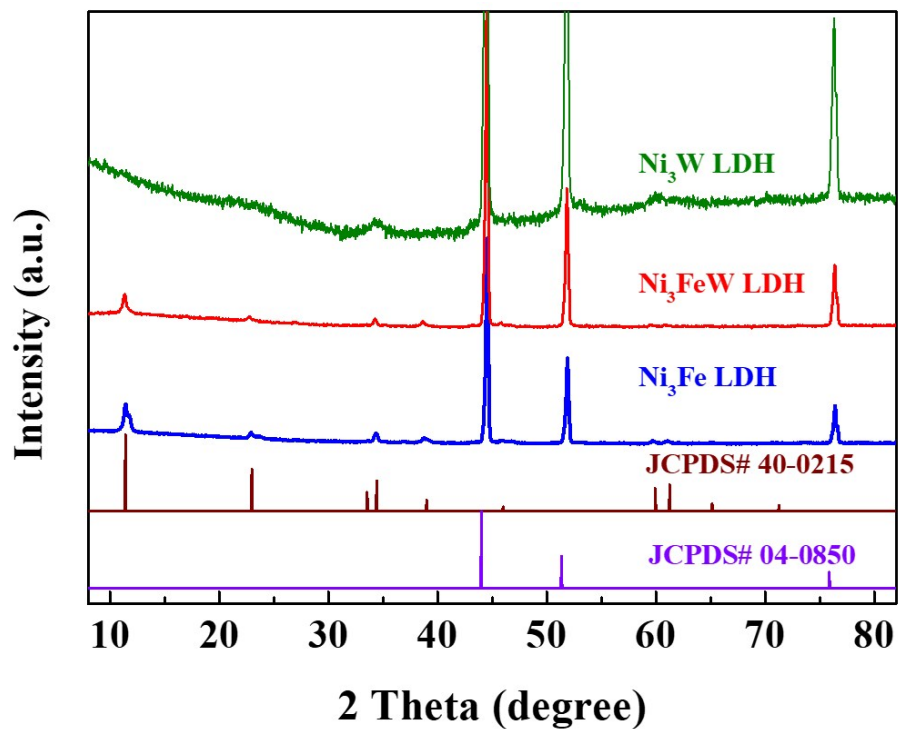

**Figure S10.** XRD patterns of Ni<sub>3</sub>Fe, Ni<sub>3</sub>FeW, and Ni<sub>3</sub>W LDH/NF and the standard PDF cards of iron nickel carbonate hydroxide (JCPDS#40-0215) and Ni (JCPDS#04-0850).

The introduction of Fe or W does not change the phase of the LDH.

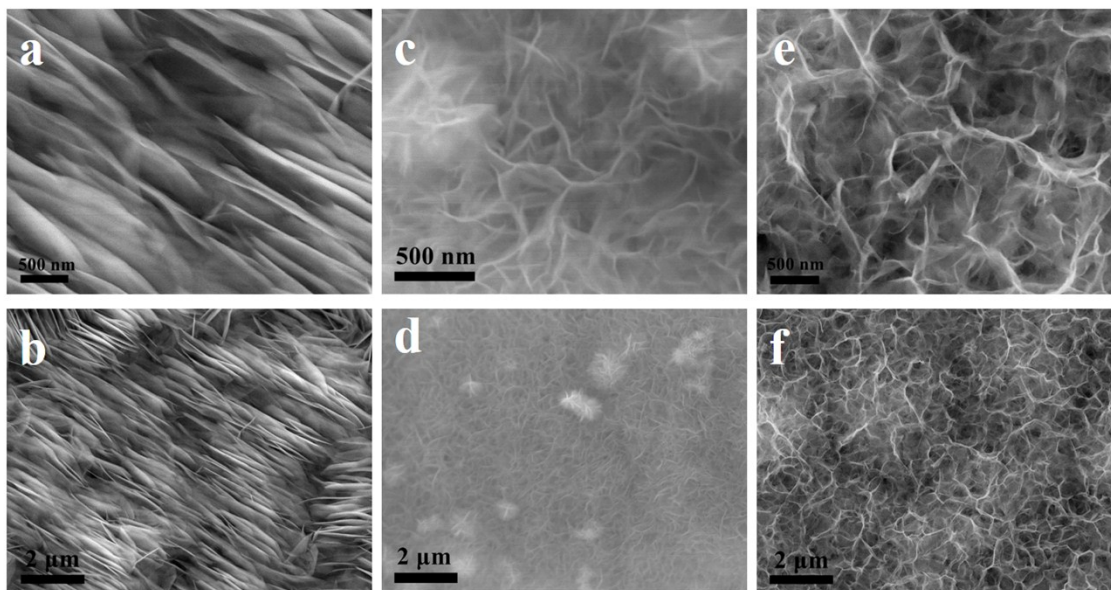

**Figure S11.** SEM images of (a, b)  $\text{Ni}_3\text{Fe}$ , (c,d)  $\text{Ni}_3\text{FeW}$ , and (e,f)  $\text{Ni}_3\text{W}$  LDH/NF.

After introducing W, the thickness of  $\text{Ni}_3\text{FeW}$  LDH nanosheets decreases.  $\text{Ni}_3\text{W}$  LDH nanosheets are more porous and thinner than either  $\text{Ni}_3\text{Fe}$  or  $\text{Ni}_3\text{FeW}$  LDH. It can be concluded that either Fe or W can affect the nanosheet structure of the final LDH, especially W.

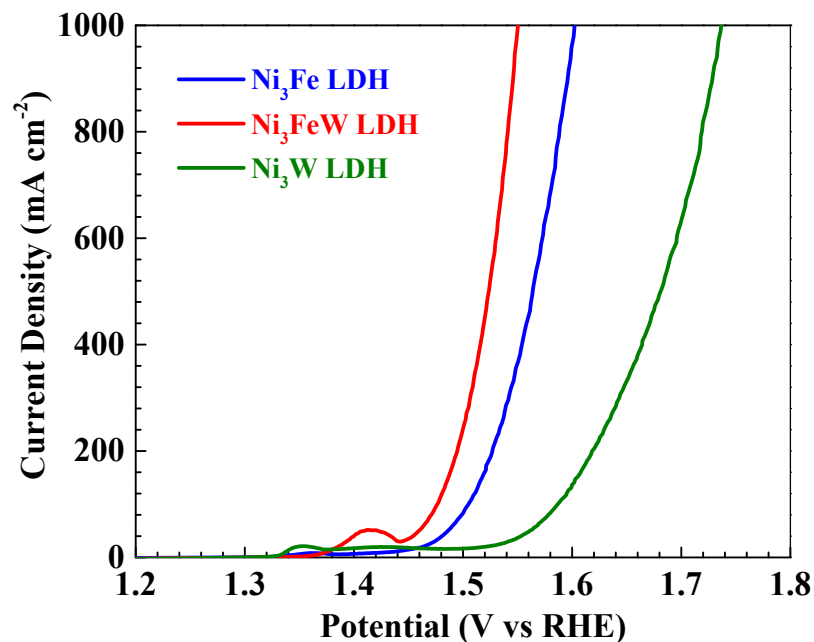

**Figure S12.** OER LSV curves of Ni<sub>3</sub>Fe, Ni<sub>3</sub>FeW, and Ni<sub>3</sub>W LDH samples in 1.0 M KOH electrolyte.

In terms of OER performance, Ni<sub>3</sub>FeW LDH is the best, Ni<sub>3</sub>Fe LDH is the second best, and Ni<sub>3</sub>W LDH is the worst. The performance difference between the Ni-Fe-W and Ni-Fe LDHs is much smaller than that between the Ni-Fe and Ni-W LDHs, indicating that Fe plays a critical role in the OER activity of LDH-based catalysts. The excellent OER activity of both the Ni<sub>3</sub>Fe and Ni<sub>3</sub>FeW LDHs should be attributed to the intrinsically high catalytic activity of Ni-Fe LDH.

The exact role of iron and the mechanism underlying its effect on the OER performance of Ni-Fe LDH catalysts are still under debate. Previous reports have shown that a layer of NiOOH can be developed on the Ni-Fe LDH catalyst surface at potentials approaching the evolution of oxygen.<sup>1</sup> Thus, NiOOH has been demonstrated to be the active phase. Normally, the introduction of Fe could create more structural defects and alter the local environment of Ni-O and NiOOH, thus enhancing the OER activity.<sup>2</sup> Here we mainly focus on the effects of W in enhancing the OER performance of Ni-Fe LDH.

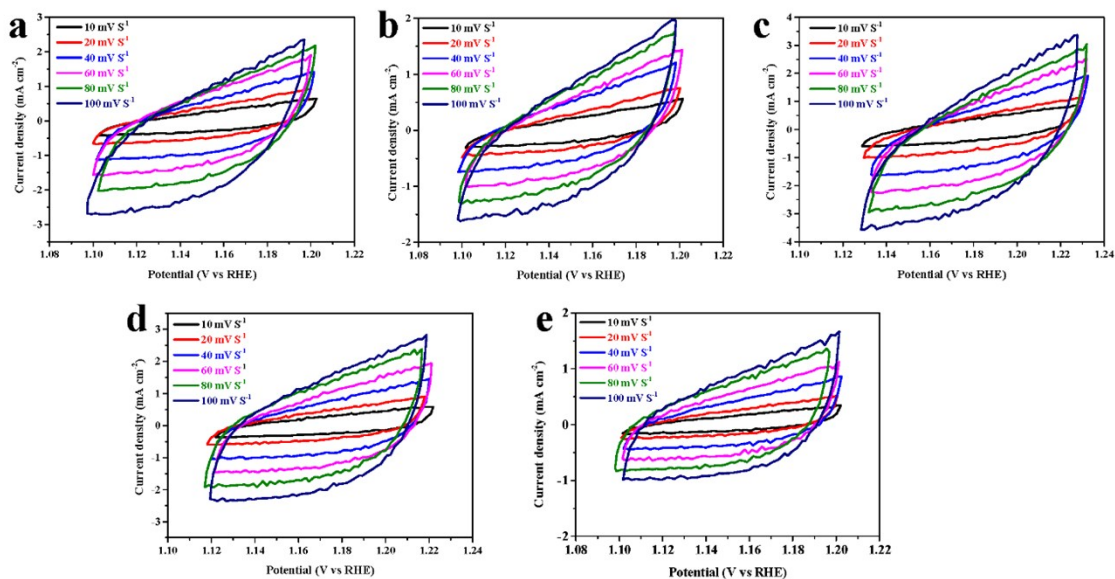

**Figure S13.** CV curves of (a) Ni<sub>3</sub>Fe LDH/NF, (b) Ni<sub>3</sub>FeW<sub>0.5</sub> LDH/NF, (c) Ni<sub>3</sub>FeW LDH/NF, (d) Ni<sub>3</sub>FeW<sub>2</sub> LDH/NF, and (e) Ni<sub>3</sub>FeW<sub>3</sub> LDH/NF at different scan rates of 10, 20, 40, 60, 80, and 100 mV S<sup>-1</sup> in a non-faradaic region.



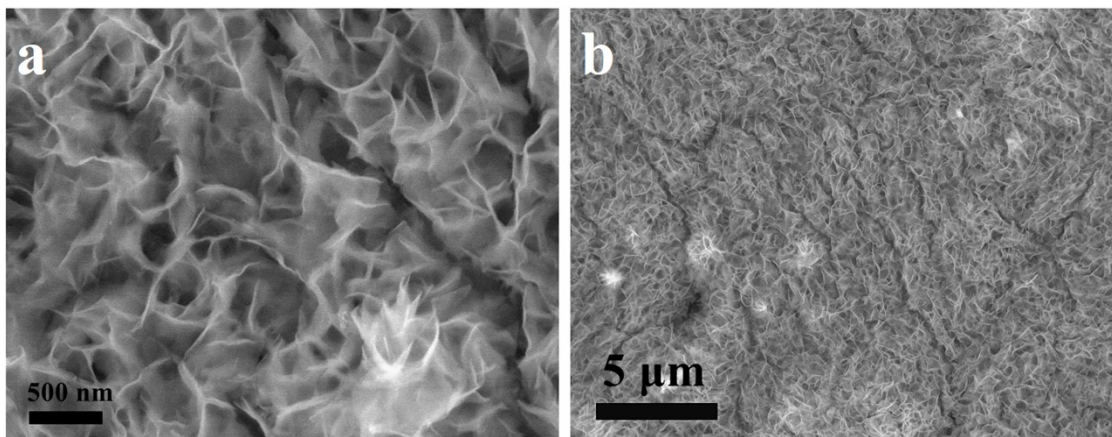

**Figure S14.** (a, b) SEM images of Ni<sub>3</sub>FeW LDH/NF after 5000 CV scans.

**Reference:**

1. H. Liu, Y. Wang, X. Lu, Y. Hu, G. Zhu, R. Chen, L. Ma, H. Zhu, Z. Tie, J. Liu and Z. Jin, *Nano Energy*, 2017, **35**, 350-357.
2. Z. Lu, W. Xu, W. Zhu, Q. Yang, X. Lei, J. Liu, Y. Li, X. Sun and X. Duan, *Chem. Commun. (Camb)*, 2014, **50**, 6479-6482.
